# Supplementary material for: A unimolecular DNA fluorescent probe for determination of copper ions based on click chemistry
Source: Royal Society of Chemistry journal article supplement (doi:10.1039/c9ra10174h), 2020-01-01
Supplement: c9ra10174h1.pdf [file c9ra10174h1.pdf]

## Electronic Supplementary Information

### **Unimolecular DNA fluorescent probe for determination of copper ion based on click chemistry**

*Yingfeng Qin<sup>a</sup>, Ming Li<sup>a</sup>, Yingying Yang<sup>a</sup>, Zhiying Gao<sup>a</sup>, Huaiheng Zhang<sup>b</sup>, Jingjin Zhao<sup>a,b\*</sup>*

a. Key Laboratory of Ecology of Rare and Endangered Species and Environmental Protection (Guangxi Normal University) , Ministry of Education, Guilin 541004, PR China.

b. Department of Chemistry and Biochemistry, Jackson State University, 1400 Lynch St., Jackson, MS, 39217 (USA).

## Supplementary Figures

### Figure S1

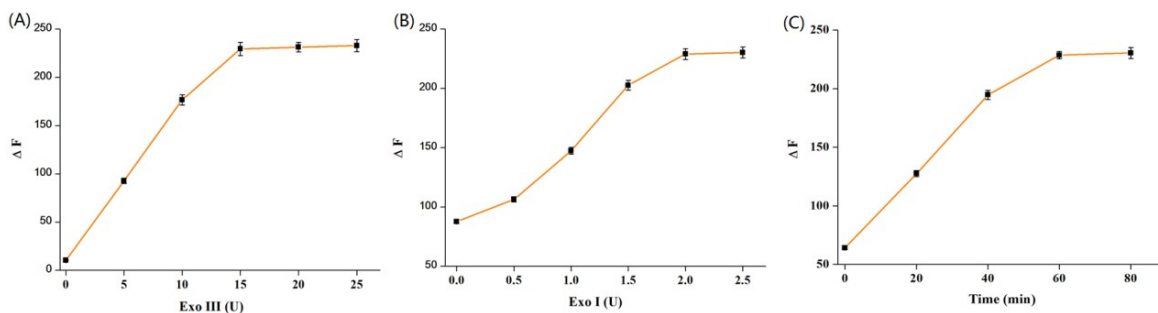

**Figure S1.** Study of (A) the concentration of Exo III; (B) the concentration of Exo I; (C) the incubation time for exonuclease digestion. The concentration of  $\text{Cu}^{2+}$  was  $5 \mu\text{M}$ . Error bars represent standard deviations of three repetitive measurements.

### Figure S2

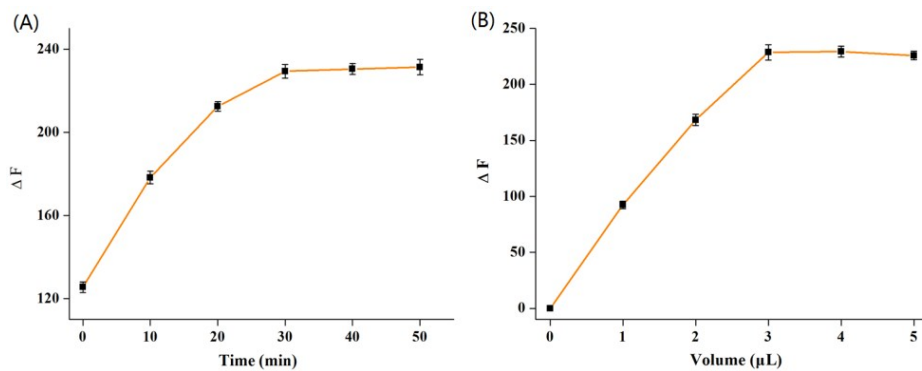

**Figure S2.** Effect of (A) reaction time of click chemistry; (B) amount of SG I of  $50\times$  used. The concentration of  $\text{Cu}^{2+}$  was  $5 \mu\text{M}$ . Error bars represent standard deviations of three repetitive measurements.
